# Supplementary material for: Effects of V and Gd doping on novel positive colossal electroresistance and quantum transport in PbPdO2 thin films with (002) preferred orientation
Source: Royal Society of Chemistry journal article supplement (doi:10.1039/d4cp00837e), 2024-01-01
Supplement: d4cp00837e1.pdf [file d4cp00837e1.pdf]

## Supplementary Information

# Effects of V and Gd doping on novel positive colossal electroresistance and quantum transport in PbPdO<sub>2</sub> thin films with (002) preferred orientation

Hai Jia<sup>a,c</sup>, Liqiang Zeng<sup>c</sup>, Wenti Guo<sup>c</sup>, Zhiya Lin<sup>a,c</sup>, Jian-Min Zhang<sup>c</sup>, Xiaohui Huang<sup>b</sup>, Zhigao  
Huang<sup>c\*</sup>, and Shaoming Ying<sup>b\*</sup>

a College of Mathematics and Physics, Ningde Normal University, Ningde 352100, China

b Fujian Provincial Key Laboratory of Featured Materials in Biochemical Industry, College  
of Chemistry and Materials, Ningde Normal University, Ningde 352100, China

c Fujian Provincial Key Laboratory of Quantum Manipulation and New Energy Materials,  
College of Physics and Energy, Fujian Normal University, Fuzhou, 350117, China

\*Corresponding author: E-mail:

zghuang@fjnu.edu.cn (Z. Huang);

yingshaoming@126.com (S. Ying).

## 1. EDS element mappings supplementary information

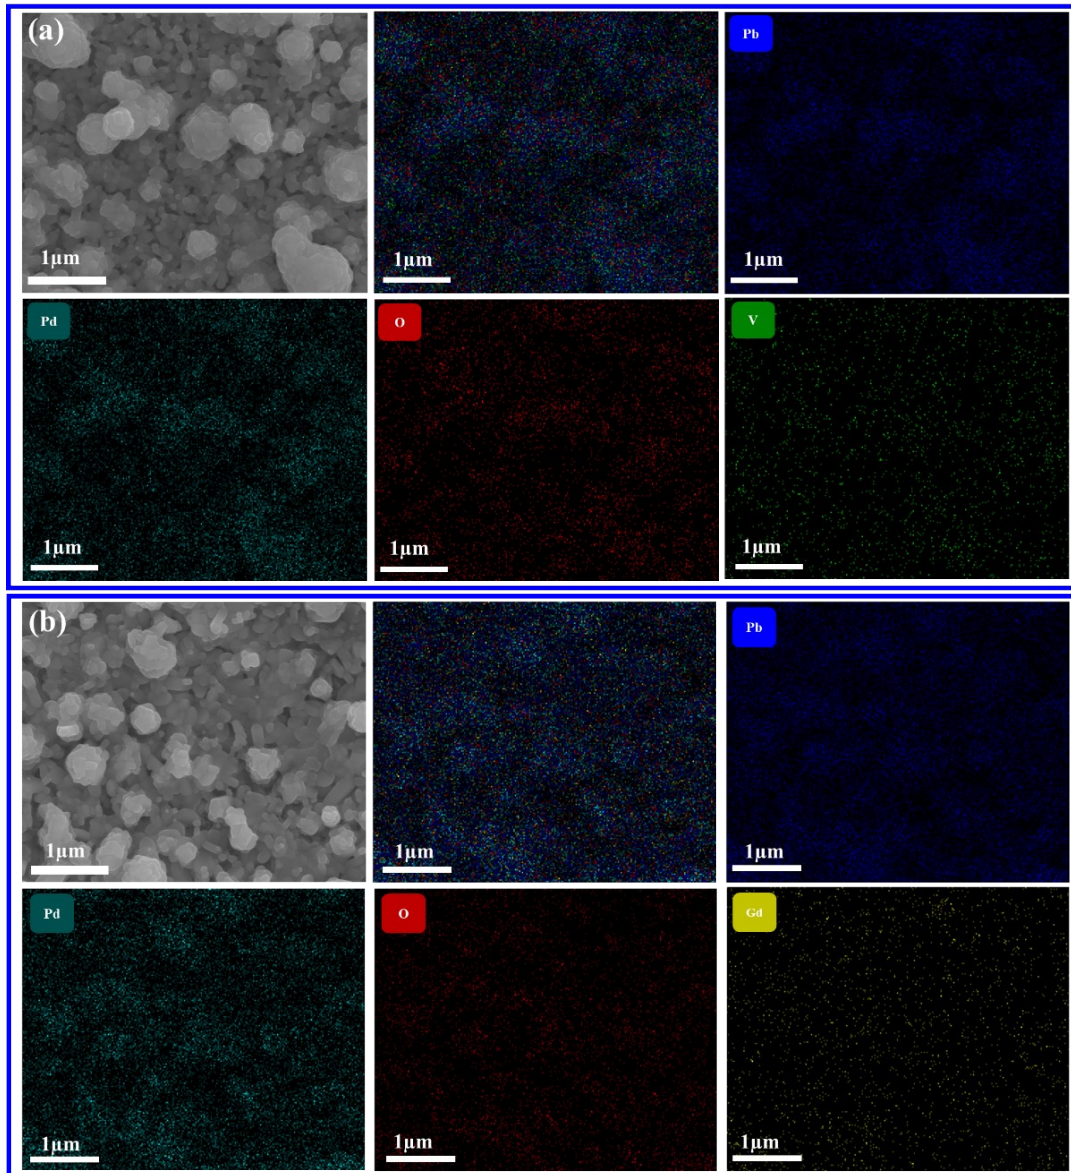

**Fig.S1** EDS element mappings images of (a) PbPd<sub>0.9</sub>V<sub>0.1</sub>O<sub>2</sub> and (b) PbPd<sub>0.9</sub>Gd<sub>0.1</sub>O<sub>2</sub> thin films.

## 2. In-situ XPS supplementary information

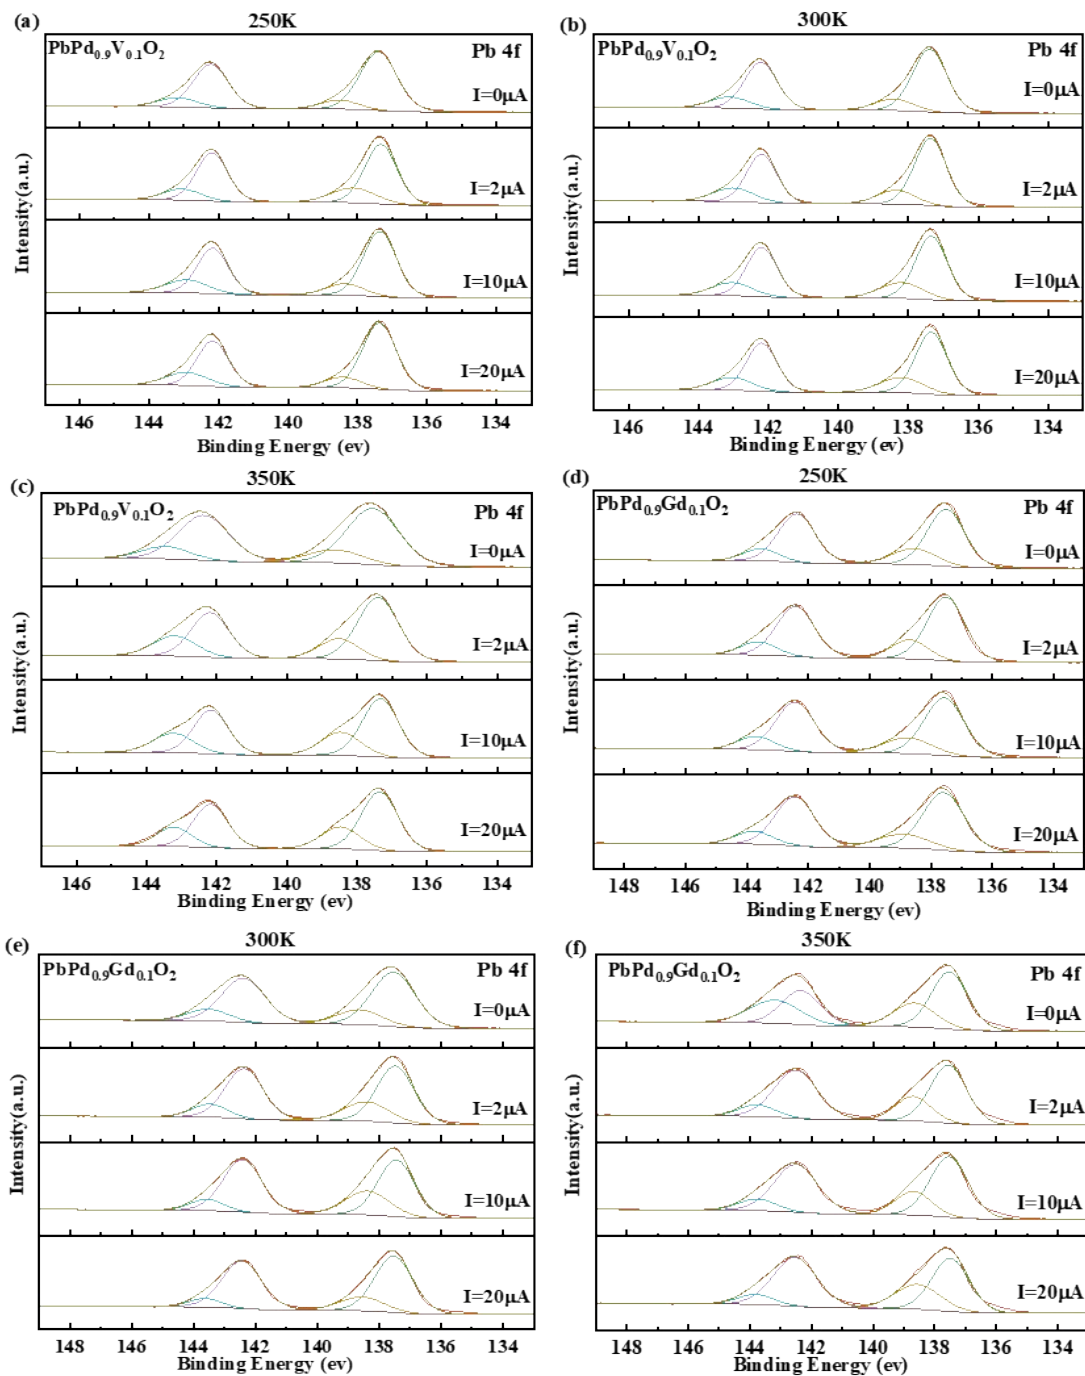

Fig. S2 (a)-(c) *In-situ* XPS of Pb 4f at  $T = 250$  K, 300 K and 350 K for PbPd<sub>0.9</sub>V<sub>0.1</sub>O<sub>2</sub> thin film; (d)-(f) *In-situ* XPS of Pb 4f at  $T = 250$  K, 300 K and 350 K for PbPd<sub>0.9</sub>Gd<sub>0.1</sub>O<sub>2</sub> thin film.

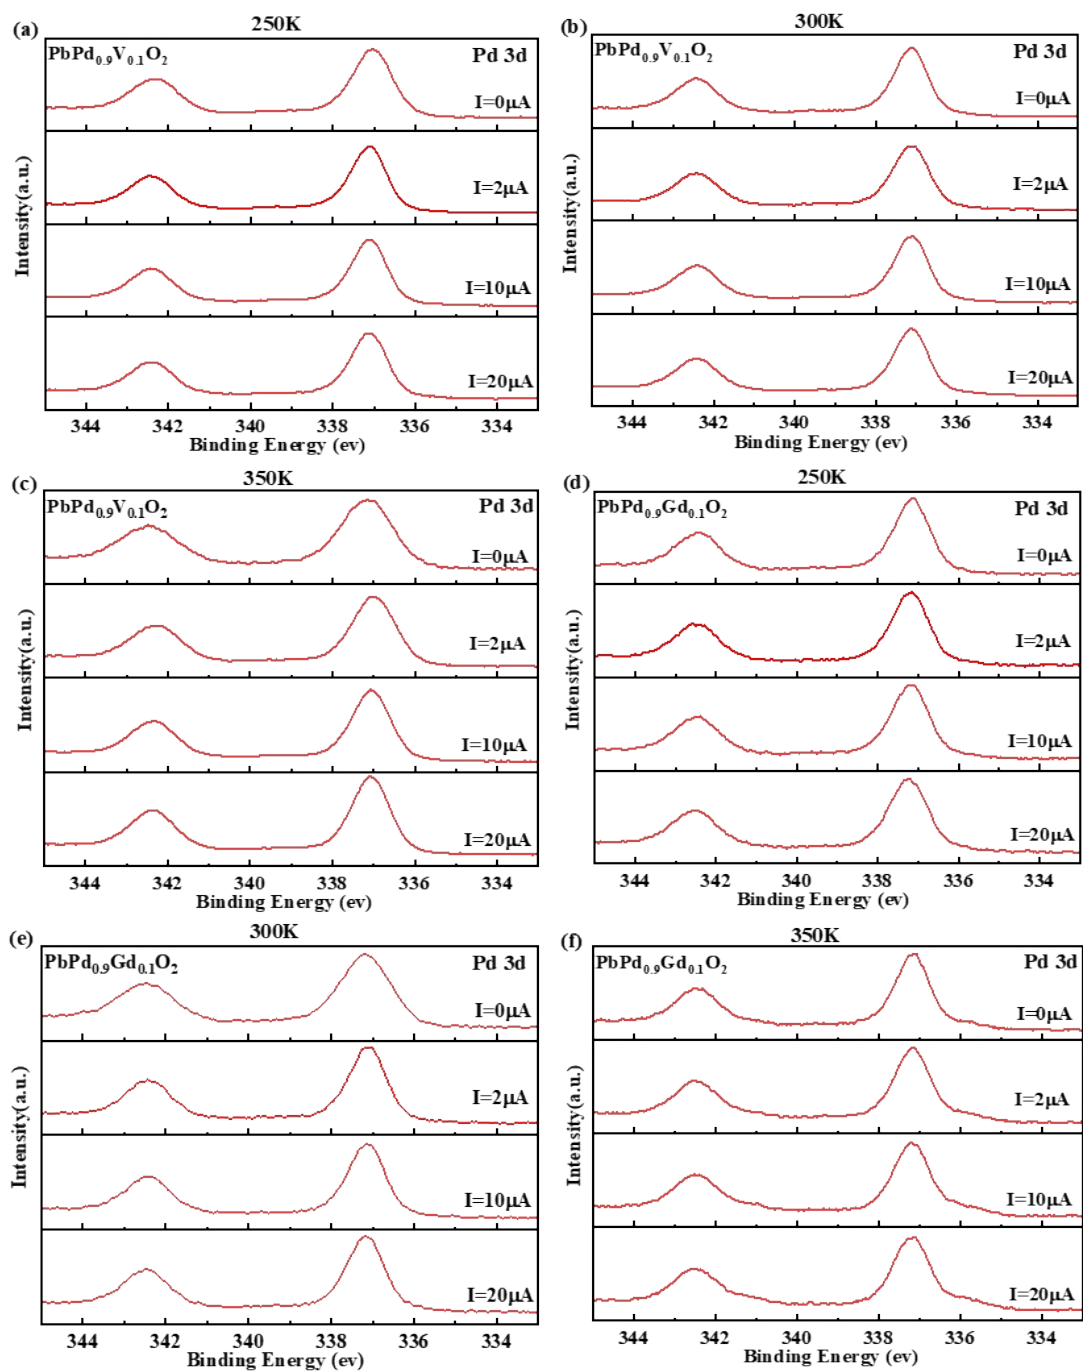

**Fig. S3** (a)-(c) *In-situ* XPS of Pd 3d at  $T = 250$  K, 300 K and 350 K for PbPd<sub>0.9</sub>V<sub>0.1</sub>O<sub>2</sub> thin film; (d)-(f) *In-situ* XPS of Pd 3d at  $T = 250$  K, 300 K and 350 K for PbPd<sub>0.9</sub>Gd<sub>0.1</sub>O<sub>2</sub> thin film.
